# Supplementary material
Source: MDPI journal article supplement (https://www.mdpi.com/2312-7481/9/7/163)
Supplement: s1 [file s1]

Supplementary File

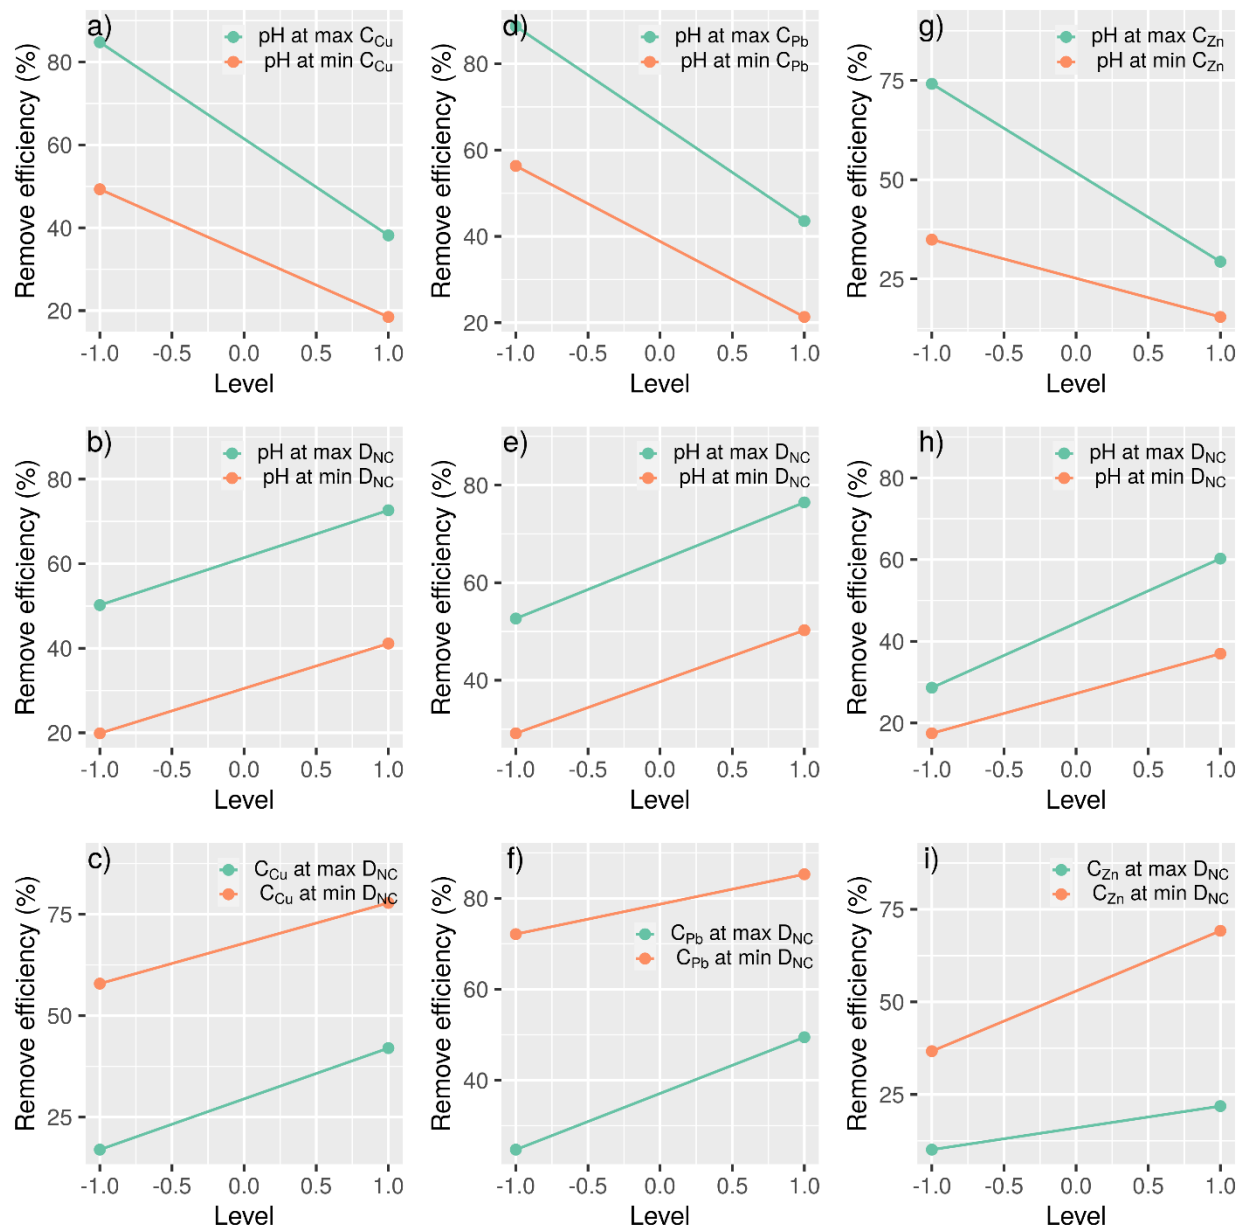

Figure S1. Interaction effect plot for Cu(II) (a–c), Pb(II) (d–f), and Zn(II) (g–i) ions removal

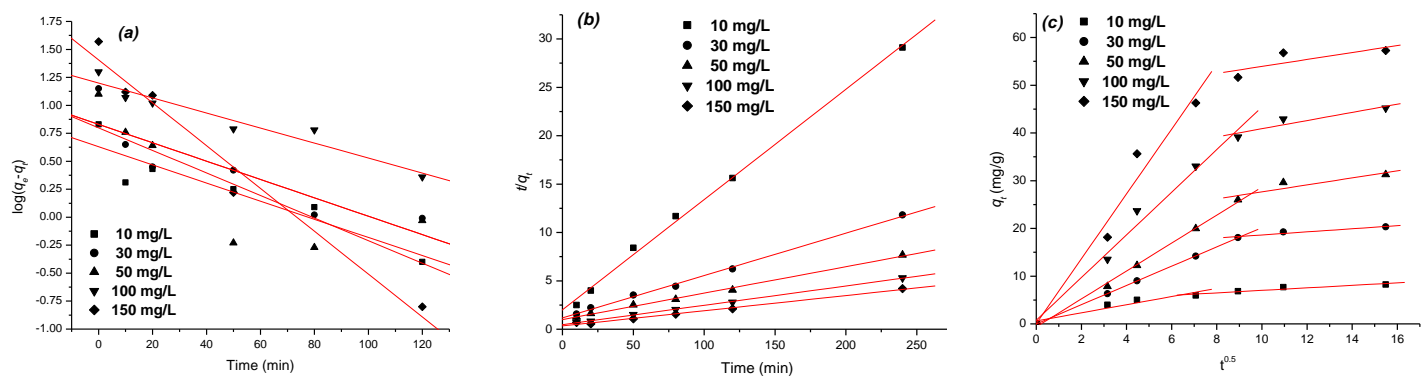

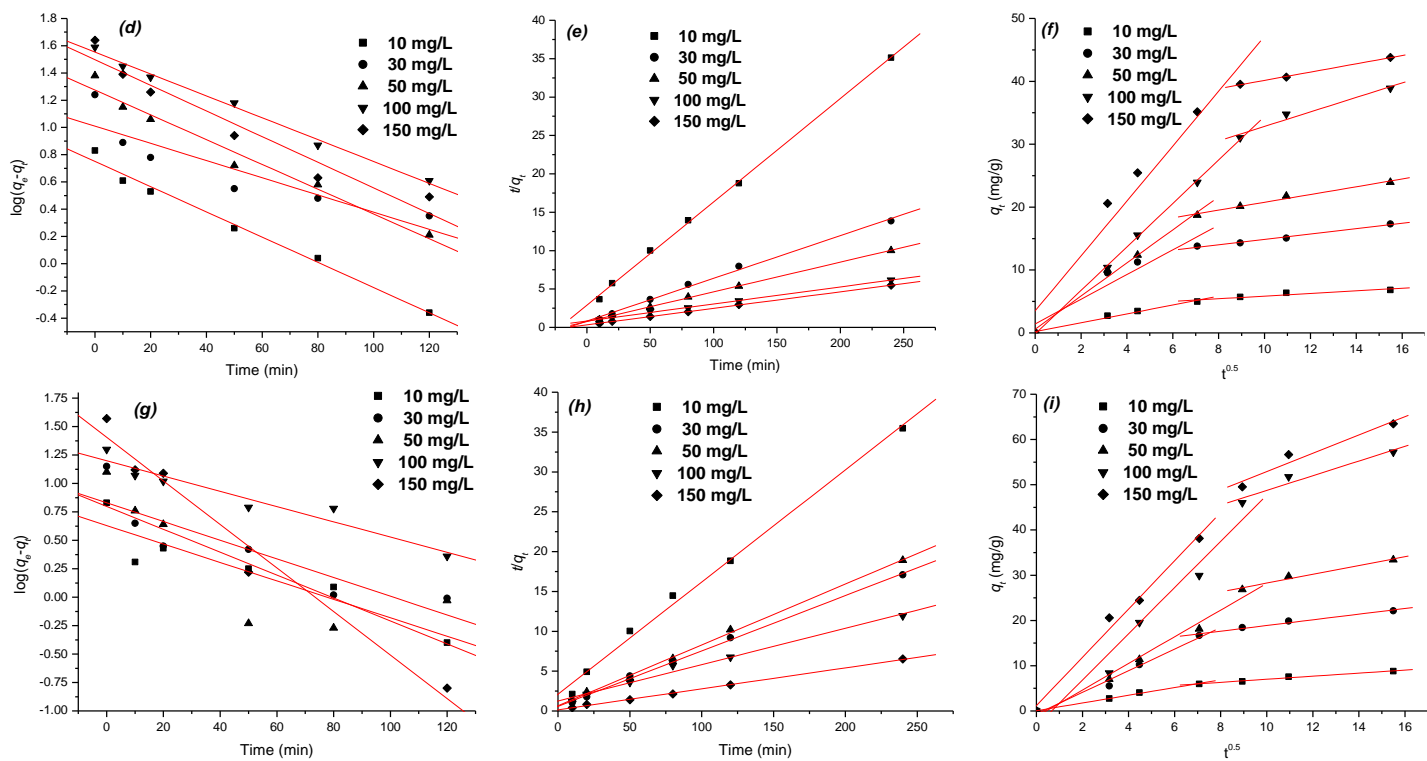

Figure S2. Plots of: pseudo-first kinetic model for the adsorption of Cu(II) (a), Zn(II) (d), Pb(II) (g); pseudo-second kinetic model for the adsorption of Cu(II) (b), Zn(II) (e), Pb(II) (h); intraparticle diffusion model for the adsorption of Cu(II) (c), Zn(II) (f), Pb(II) (i) on NC.

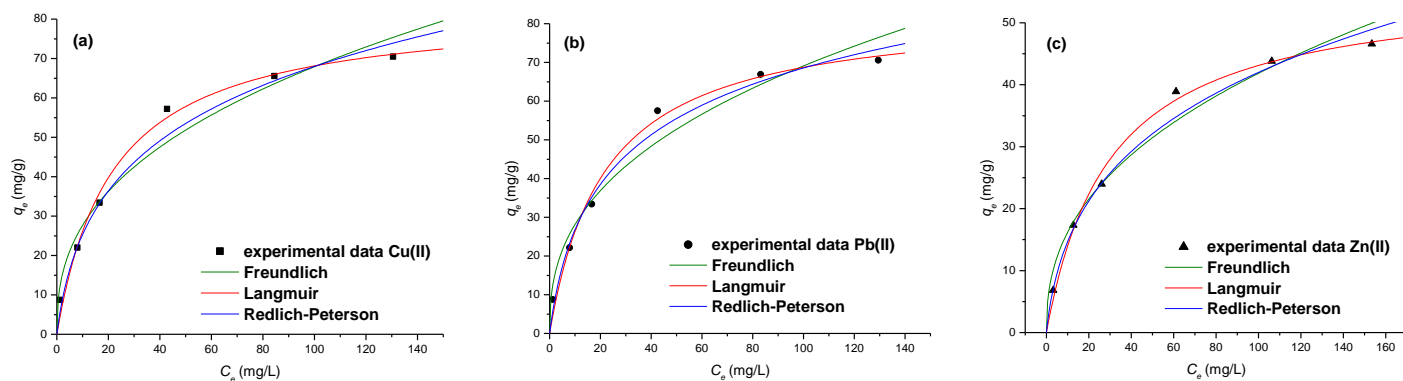

Figure S3. Isotherm plots for the adsorption of Cu(II) (a), Pb(II) (b), and Zn(II) (c) on NC.
